# Supplementary material for: NMR-Based Metabolomic Analysis of Plasma in Patients with Adult Congenital Heart Disease and Associated Pulmonary Arterial Hypertension: A Pilot Study
Source: MDPI journal article supplement (doi:10.3390/metabo12090845), 2022-09-08
Supplement: s1 [file s1]

# **NMR-based Metabolomic Analysis of Plasma in Patients with Adult Congenital Heart Disease and Associated Pulmonary Arterial Hypertension: A Pilot Study**

Beizhu Xu, Caihua Huang, Caojin Zhang, Donghai Lin and Weifeng Wu

5 Supplementary Figures;

1 Supplementary Table.

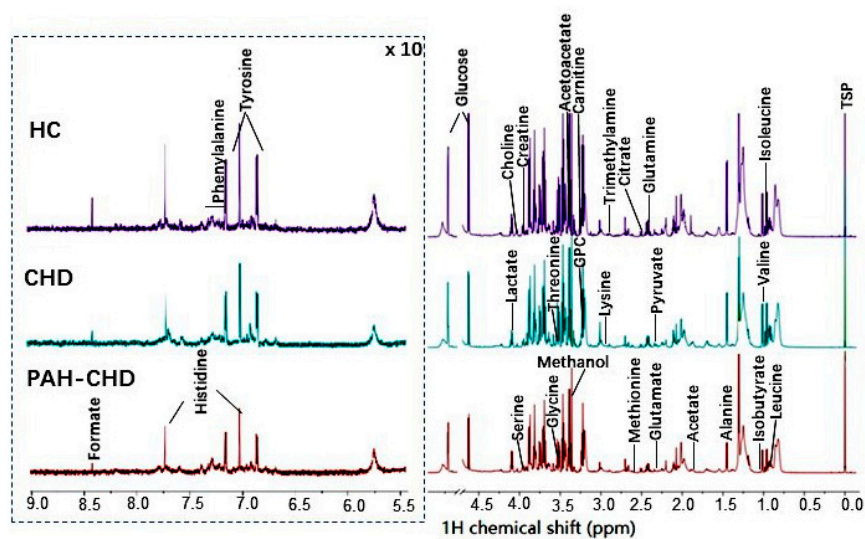

**Figure S1.** The typical 1D  $^1\text{H}$ -NMR spectra recorded on the three group of plasma and resonance assignments of metabolites. Spectral region of  $\delta 5.1\text{--}4.5$  ppm (water resonance) was removed and the region of  $\delta 9.0\text{--}5.3$  ppm was amplified 10 times to make the peaks of low concentration metabolites easy to recognize. PAH-CHD, pulmonary arterial hypertension associated with congenital heart disease; CHD, congenital heart disease; HC, healthy control; GPC, glycerylphosphorylcholine.

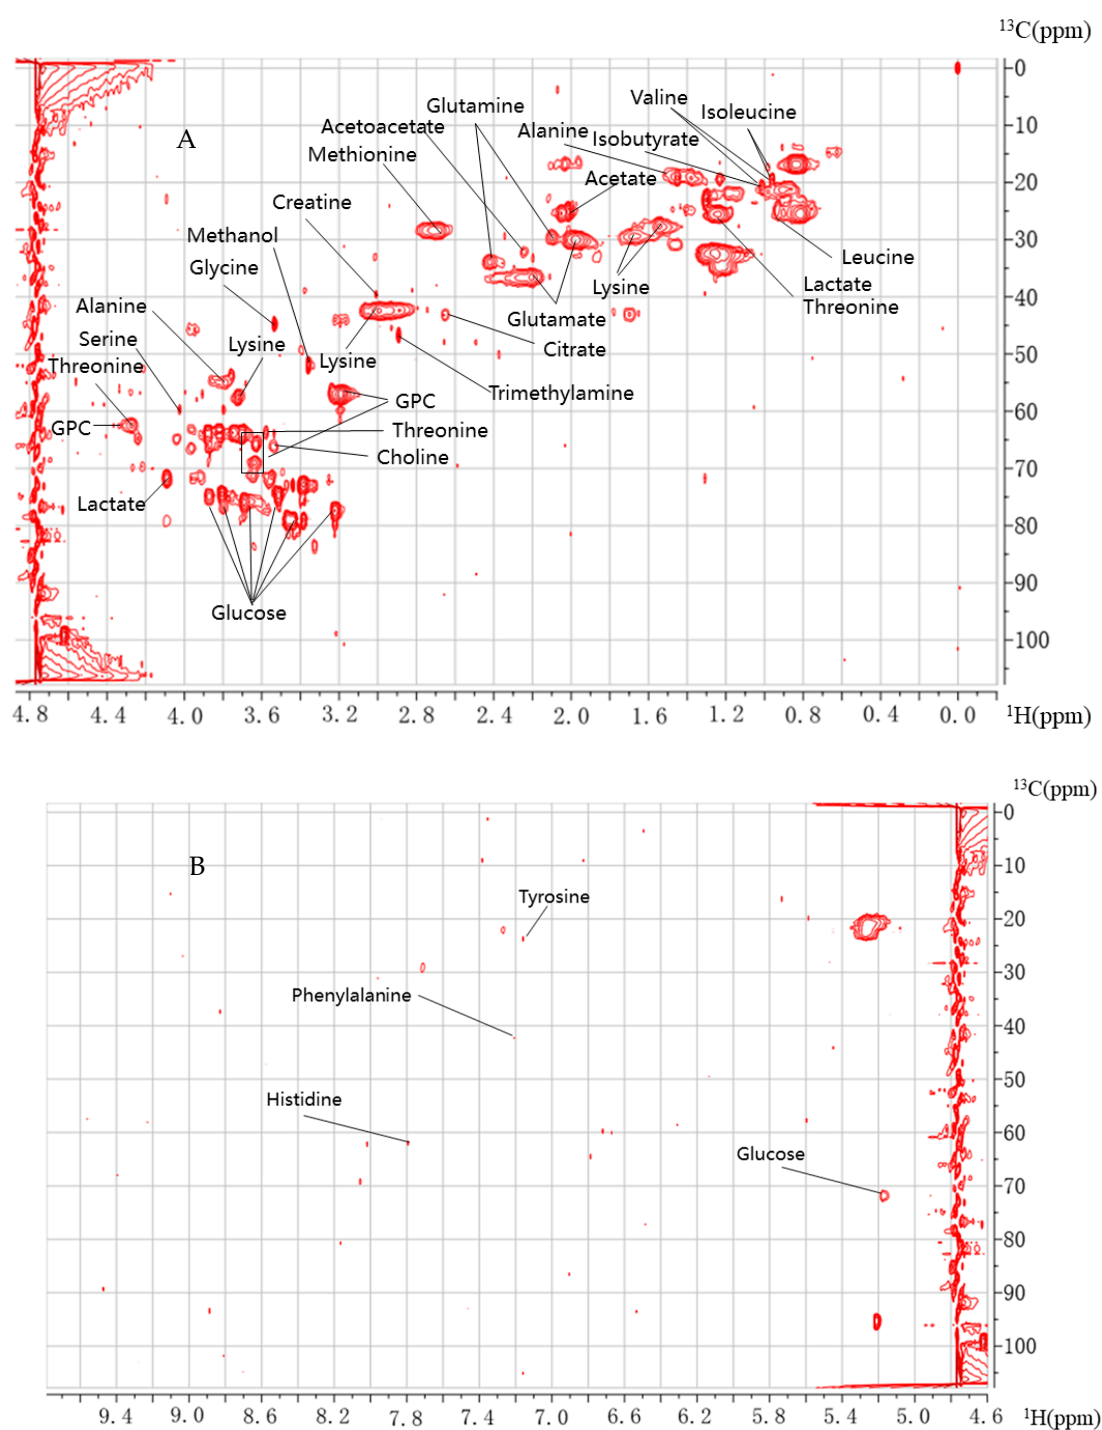

**Figure S2.** 2D  $^1\text{H}$ - $^{13}\text{C}$  heteronuclear single quantum coherence (HSQC) spectrum and resonance assignments of metabolites.

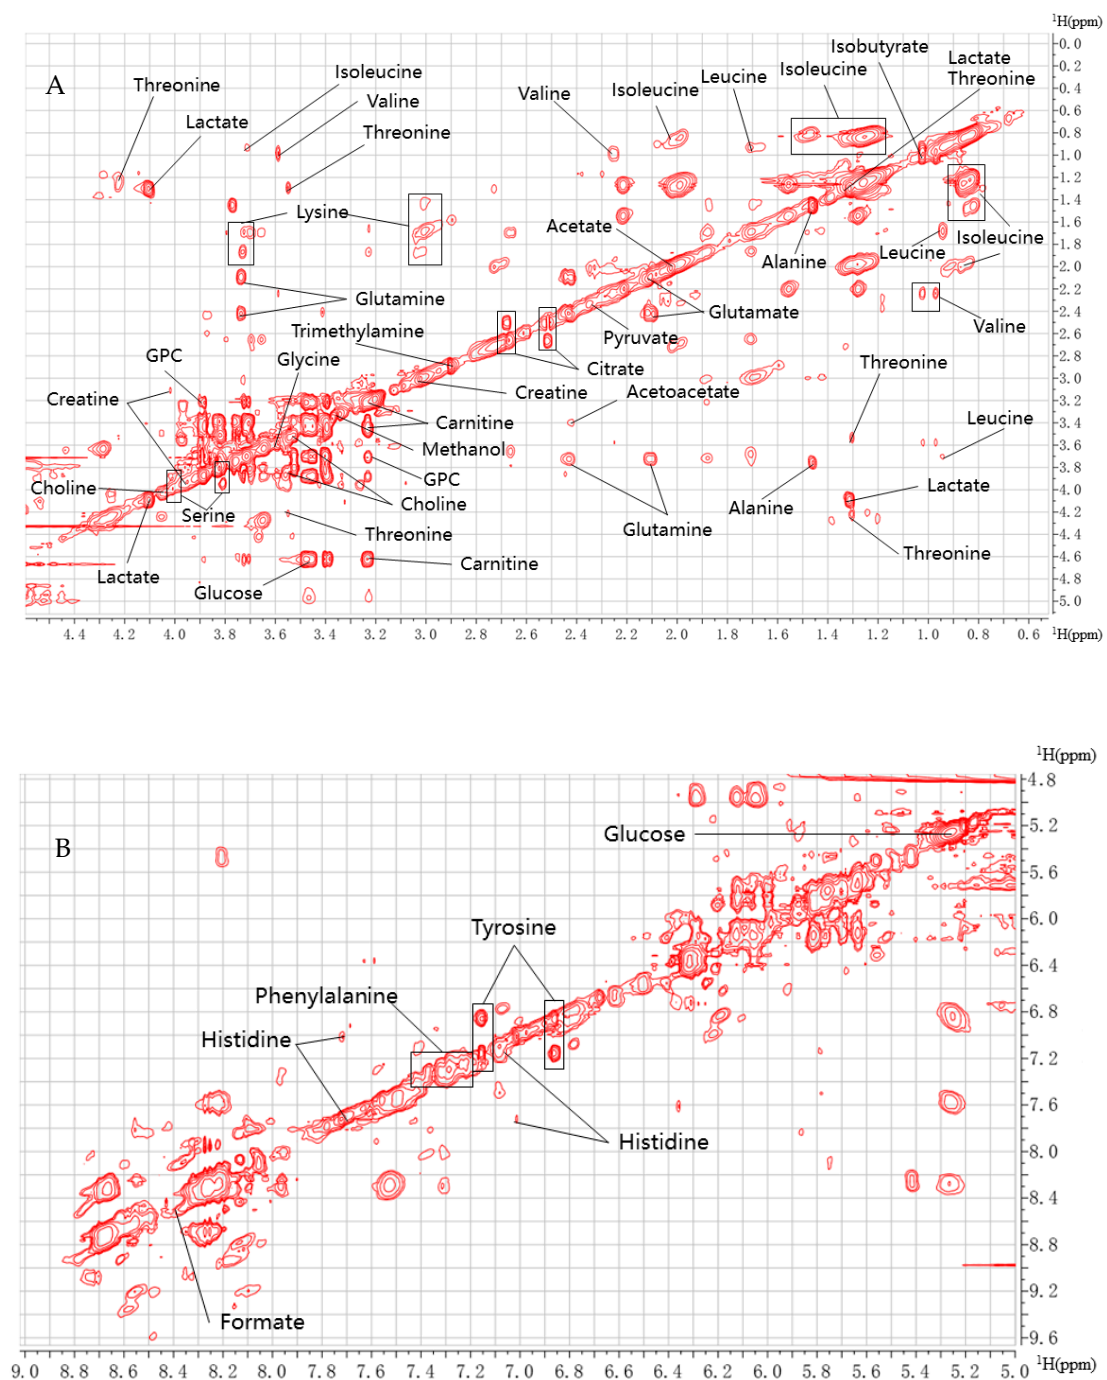

**Figure S3.** 2D  $^1\text{H}$ - $^1\text{H}$  total correlation spectroscopy (TOCSY) spectrum and resonance assignments of metabolites.

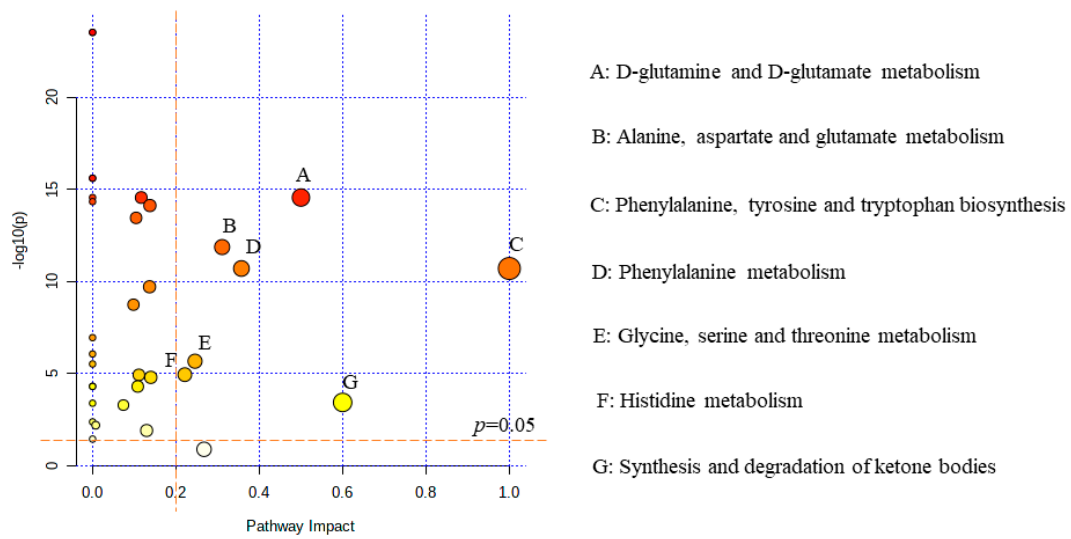

**Figure S4.** Metabolic pathway analysis for identifying significantly altered metabolic pathways in CHD relative to HC.

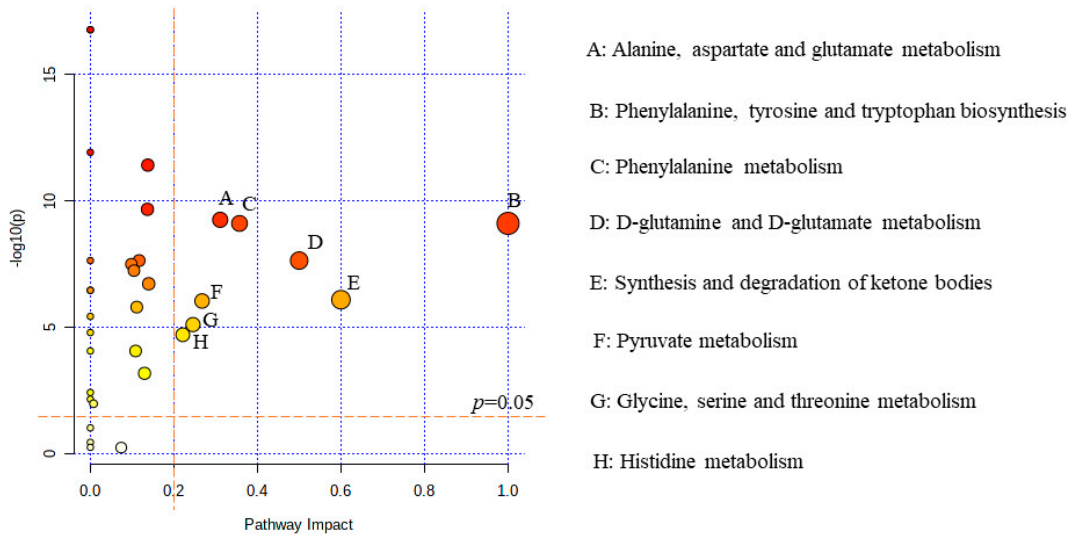

**Figure S5.** Metabolic pathway analysis for identifying significantly altered metabolic pathways in PAH-CHD relative to HC.

**Table S1.** Relative levels of metabolites identified from 1D <sup>1</sup>H-NMR spectra (mean ± SD)

| Metabolites    | PAH-CHD      | CHD          | HC           |
|----------------|--------------|--------------|--------------|
| Leucine        | 1.258±0.280  | 1.554±0.371  | 1.246±0.202  |
| Isoleucine     | 0.505±0.102  | 0.574±0.146  | 0.433±0.097  |
| Valine         | 1.558±0.287  | 1.806±0.334  | 1.355±0.248  |
| Isobutyrate    | 0.056±0.021  | 0.047±0.014  | 0.015±0.012  |
| Alanine        | 2.444±0.570  | 3.071±0.723  | 2.722±0.563  |
| Acetate        | 0.323±0.140  | 0.218±0.066  | 0.142±0.029  |
| Glutamate      | 1.296±0.252  | 1.211±0.228  | 0.911±0.315  |
| Pyruvate       | 0.260±0.039  | 0.280±0.071  | 0.238±0.084  |
| Glutamine      | 4.298±0.758  | 4.881±0.700  | 3.271±0.487  |
| Citrate        | 0.912±0.266  | 0.758±0.161  | 0.480±0.101  |
| Methionine     | 0.499±0.093  | 0.547±0.083  | 0.354±0.061  |
| Trimethylamine | 0.047±0.011  | 0.041±0.009  | 0.022±0.007  |
| Lysine         | 2.718±0.308  | 2.781±0.280  | 1.741±0.248  |
| GPC            | 0.274±0.175  | 0.367±0.092  | 0.303±0.073  |
| Carnitine      | 0.106±0.030  | 0.100±0.025  | 0.072±0.015  |
| Methanol       | 1.989±0.420  | 2.293±0.483  | 0.863±0.504  |
| Glucose        | 32.976±4.044 | 38.480±5.739 | 35.066±4.912 |
| Acetoacetate   | 0.361±0.091  | 0.317±0.085  | 0.246±0.053  |
| Glycine        | 1.285±0.735  | 2.070±0.653  | 1.705±0.242  |
| Threonine      | 3.183±2.270  | 1.161±0.356  | 0.966±0.320  |
| Creatine       | 0.576±0.149  | 0.557±0.143  | 0.323±0.069  |
| Serine         | 3.031±0.364  | 2.731±0.394  | 2.202±0.328  |
| Choline        | 0.539±0.390  | 0.792±0.467  | 0.484±0.150  |
| Lactate        | 6.386±1.709  | 4.579±1.263  | 4.271±1.208  |
| Tyrosine       | 0.254±0.059  | 0.239±0.048  | 0.192±0.038  |
| Phenylalanine  | 0.162±0.074  | 0.137±0.050  | 0.053±0.023  |
| Histidine      | 0.378±0.060  | 0.417±0.059  | 0.366±0.048  |
| Formate        | 0.071±0.061  | 0.033±0.010  | 0.026±0.011  |

Abbreviations: PAH-CHD, pulmonary arterial hypertension associated with congenital heart disease; CHD, congenital heart disease; HC, healthy control; GPC, glycerylphosphorylcholine.
